# Supplementary material for: Factors affecting photocatalytic activity of visible light-responsive titanium dioxide doped with chromium ions
Source: Royal Society of Chemistry journal article supplement (doi:10.1039/c8cy01411f), 2018-01-01
Supplement: c8cy01411f1.pdf [file c8cy01411f1.pdf]

## Supporting Information

# Factors affecting photocatalytic activity of visible light responsive titanium dioxide doped with chromium ions

Naoto Nishiyama<sup>†</sup>, Keisuke Kozasa<sup>†</sup>, Toshihiro Okajima<sup>§</sup>, Mamoru Fujitsuka<sup>‡</sup>, Tetsuro Majima<sup>‡</sup>  
and Suzuko Yamazaki<sup>\*†</sup>

<sup>†</sup> Division of Environmental Science and Engineering, Graduate School of Science and Engineering, Yamaguchi University, Yamaguchi 753-8512, Japan

<sup>†</sup> Division of Earth Science, Biology, and Chemistry, Graduate School of Sciences and Technology for Innovation, Yamaguchi University, Yamaguchi 753-8512, Japan

<sup>§</sup> Kyushu Synchrotron Light Research Center (SAGA-LS), Saga 841-0005, Japan

<sup>‡</sup> The Institute of Scientific and Industrial Research (SANKEN), Osaka University, Osaka 567-0047, Japan

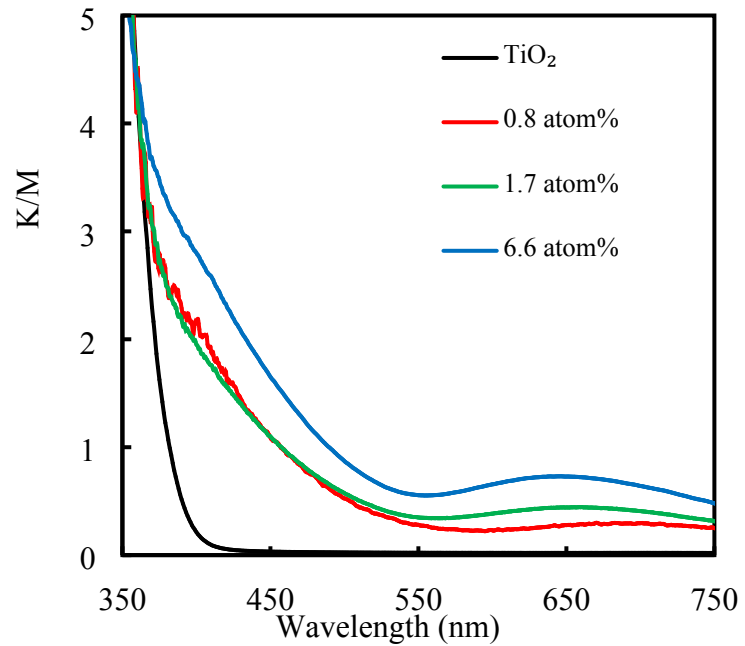

**Fig. S1** UV-vis diffuse reflectance spectra of TiO<sub>2</sub> and 0.8 – 6.6 atom% Cr-TiO<sub>2</sub> sintered at 200°C.

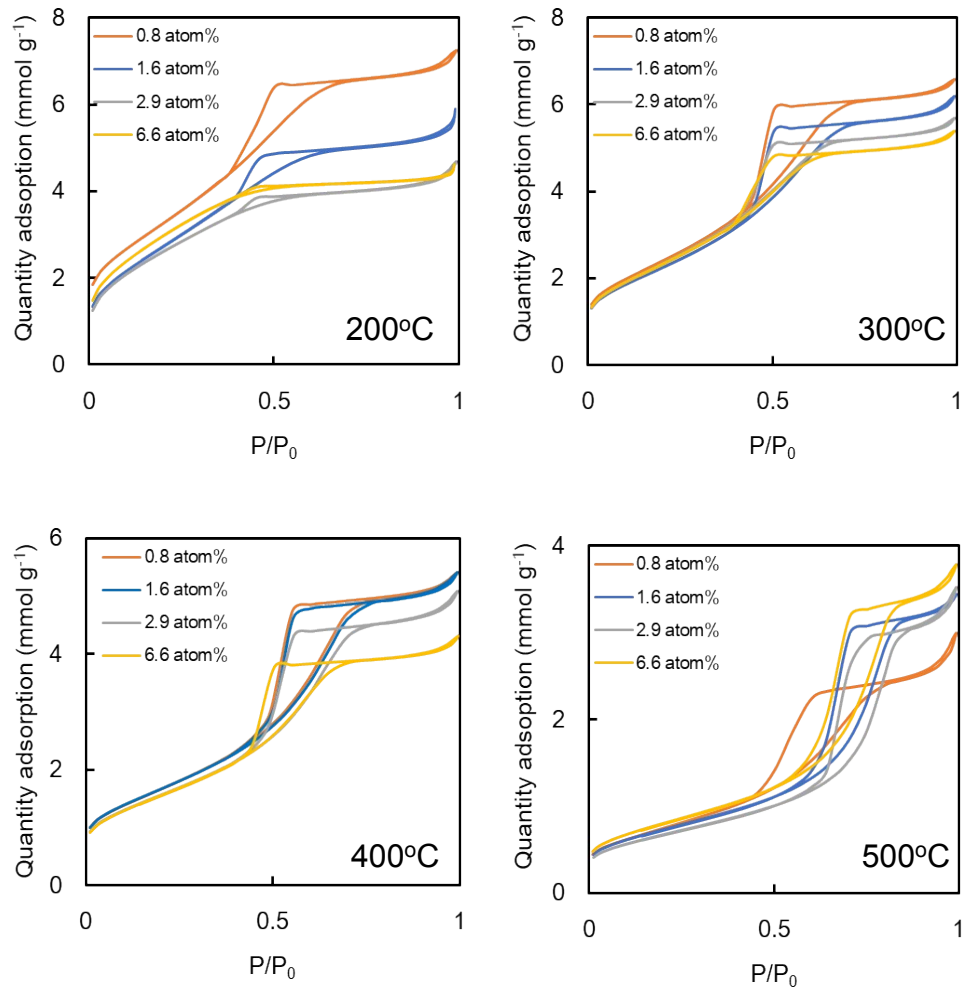

**Fig. S2**  $N_2$  adsorption-desorption isotherms of 0.8 – 6.6 atom% Cr- $\text{TiO}_2$  sintered at 200 - 500 $^{\circ}\text{C}$ .

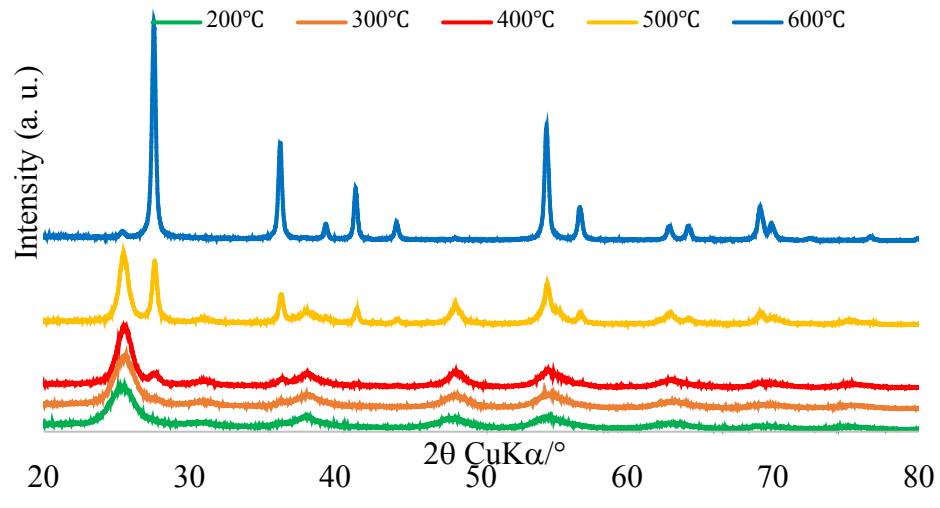

0.8 atom%

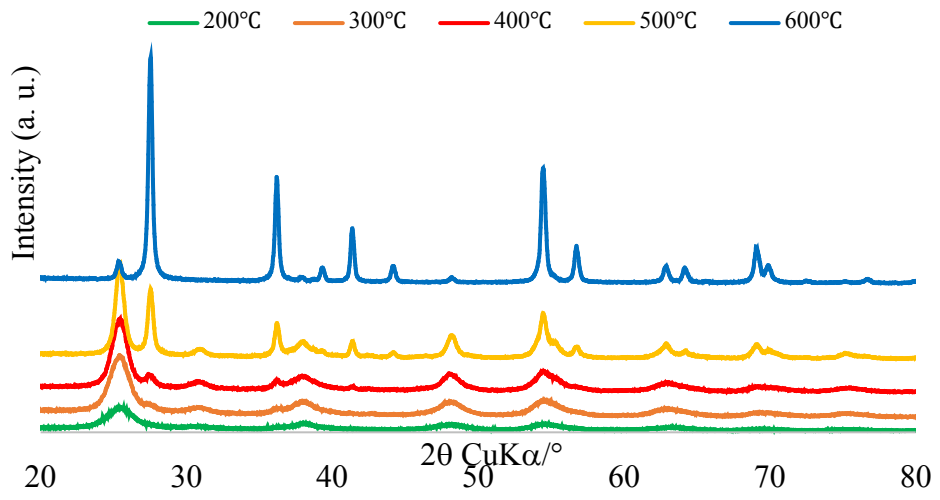

1.7 atom%

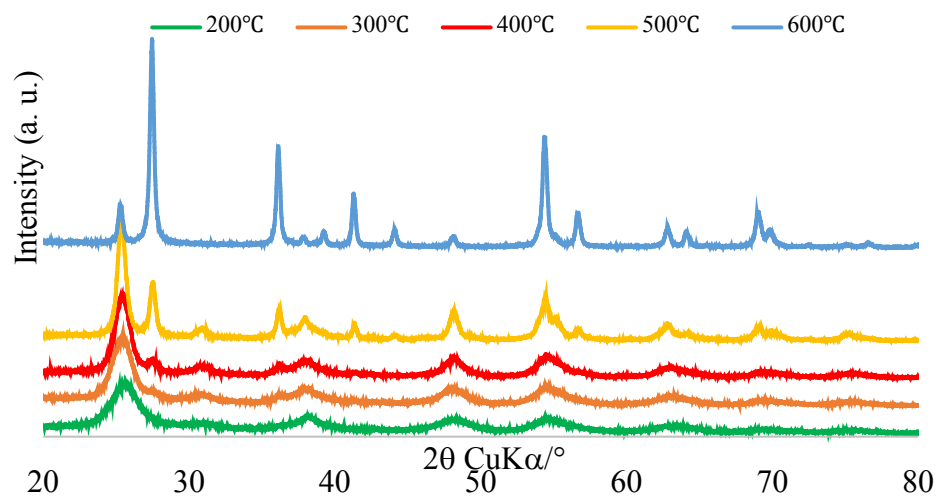

2.9 atom%

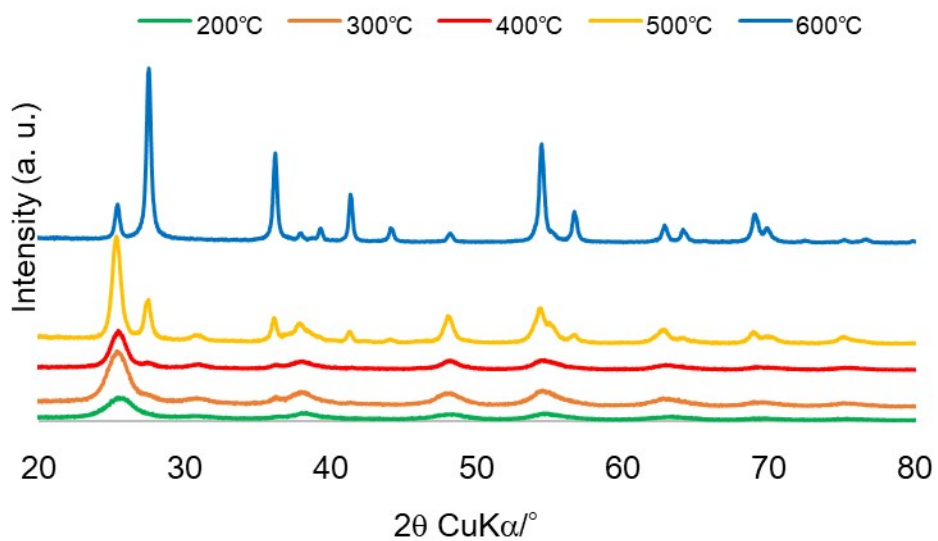

6.6 atom%

**Fig. S3** XRD patterns of 0.8 – 6.6 atom% Cr-TiO<sub>2</sub> sintered at 200 - 600°C.

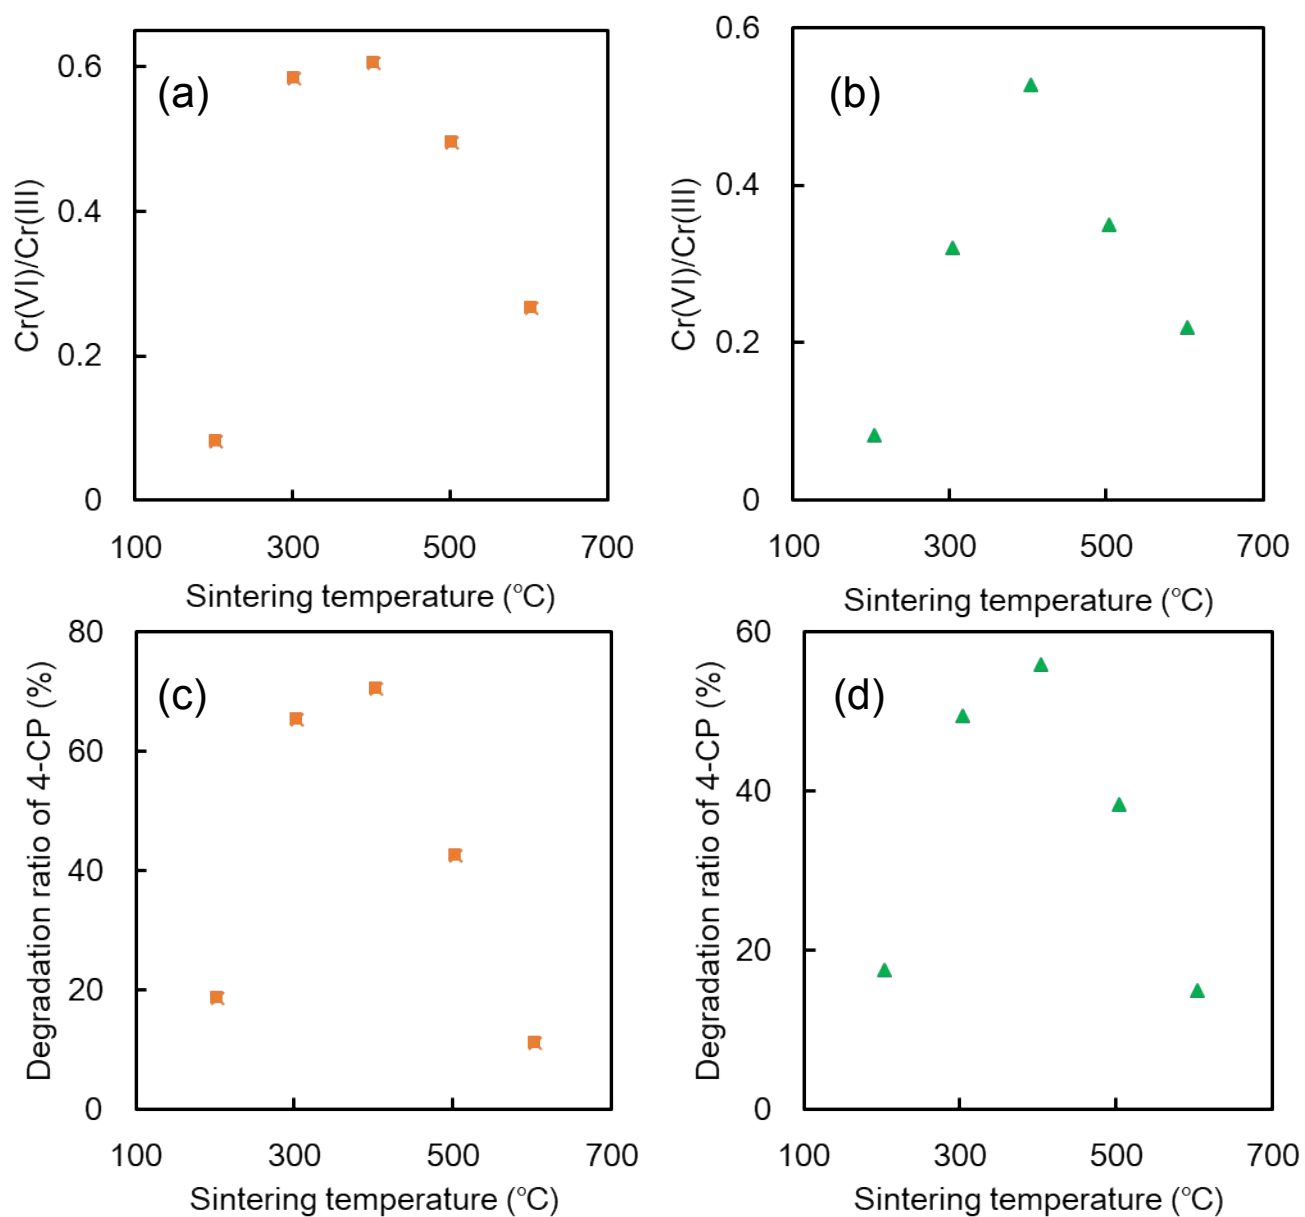

**Fig. S4** Plots of Cr(VI)/Cr(III) ratios or 4-CP degradation ratio against sintering temperature for 2.9 atom% (a), (c) and 6.6 atom% Cr-TiO<sub>2</sub> (b), (d), after visible light irradiation for 150 min.

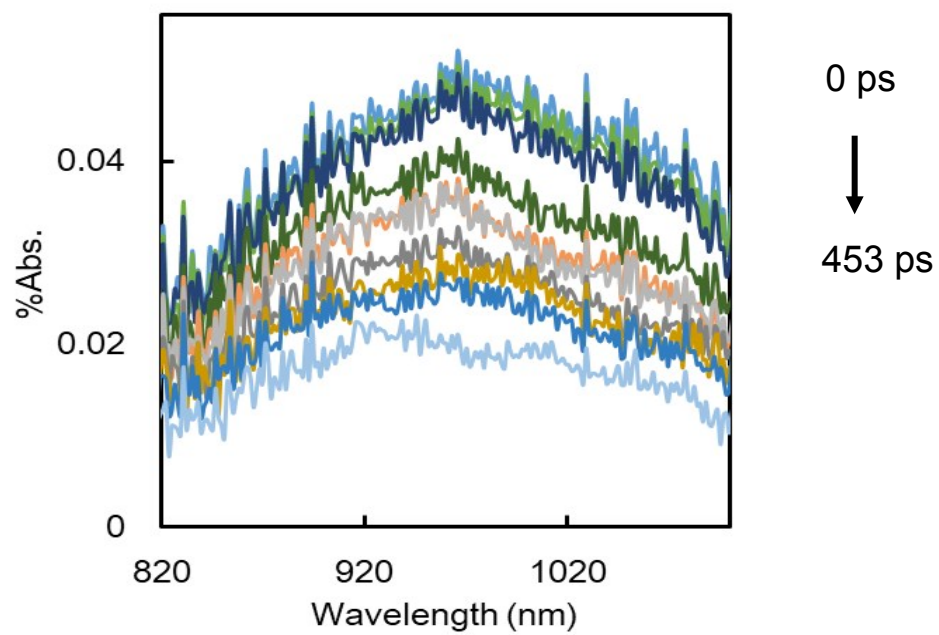

**Fig. S5** TDR spectra observed after 80 fs laser flash for 6.6 atom% Cr-TiO<sub>2</sub> sintered at 400°C.

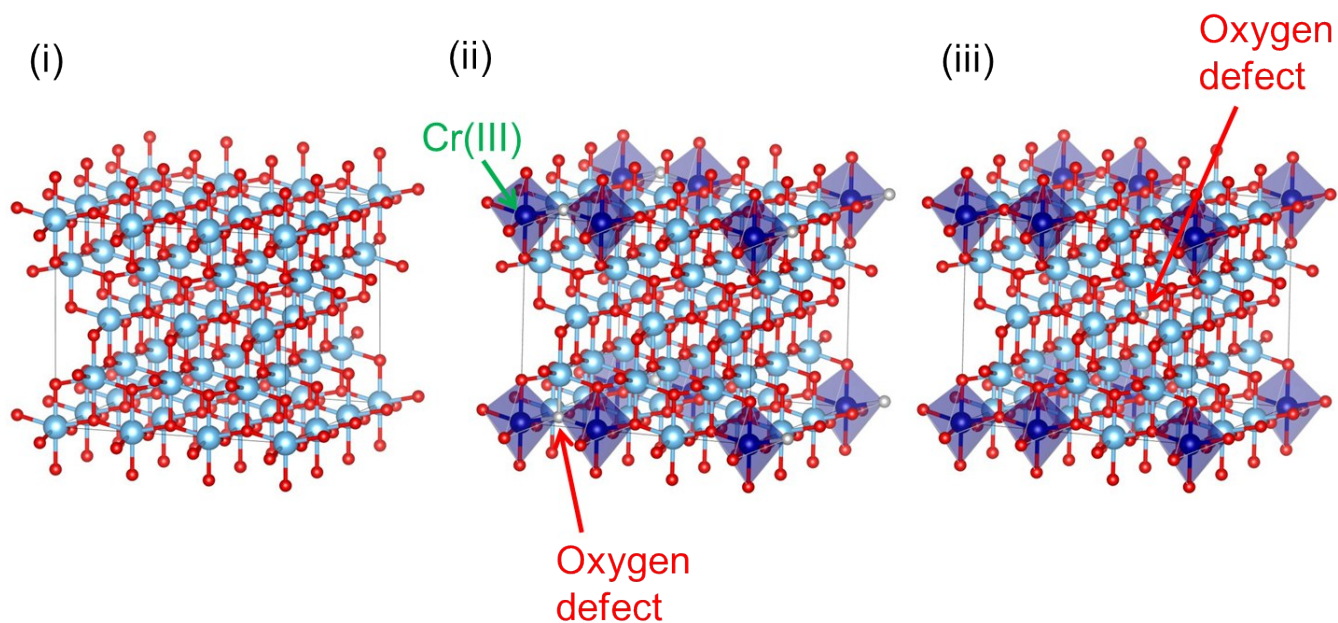

**Fig. S6** Local structure models of (i) anatase  $\text{TiO}_2$   $3 \times 3 \times 1$  supercell; (ii) model\_a: two neighboring Ti(IV) were replaced with Cr(III) and oxygen between the atoms was withdrawn; and (iii) model\_b: two neighboring Ti(IV) sites were replaced with Cr(III) and distant oxygen was withdrawn.
